# Supplementary material for: Aminotriazine derived N-doped mesoporous carbon with a tunable nitrogen content and their improved oxygen reduction reaction performance
Source: Royal Society of Chemistry journal article supplement (doi:10.1039/d4nr02425g), 2024-01-01
Supplement: d4nr02425g1.pdf [file d4nr02425g1.pdf]

## Tailoring nitrogen doping in metal-free mesoporous carbons derived from aminotriazine for superior oxygen reduction reaction

Jefrin M. Davidraj<sup>1</sup>, CI Sathish<sup>1\*</sup>, Premkumar Selvarajan<sup>2</sup>, Mohammed Fawaz<sup>1</sup>, Vibin Perumalsamy<sup>1</sup>, Xiaojiang Yu<sup>3</sup>, Mark BH Breese<sup>3</sup>, Jiabao Yi<sup>1\*</sup> and Ajayan Vinu<sup>\*1</sup>

<sup>1</sup>Global Innovative Centre for Advanced Nanomaterials (GICAN), School of Engineering, The University of Newcastle, Callaghan, New South Wales 2308, Australia

<sup>2</sup>Department of Physics, School of Advanced Sciences, Vellore Institute of Technology, Vellore, India.

<sup>3</sup> Singapore Synchrotron Light Source, National University of Singapore, Singapore, 119260

Correspondence E-mail: [sathish.ci@newcastle.edu.au](mailto:sathish.ci@newcastle.edu.au), [jiabao.yi@newcastle.edu.au](mailto:jiabao.yi@newcastle.edu.au)  
[ajayan.vinu@newcatle.edu.au](mailto:ajayan.vinu@newcatle.edu.au)

**Table S1:** Summary of XPS deconvolutions

| Sample      | C 1s  |       |       |      | N 1s        |            |             |
|-------------|-------|-------|-------|------|-------------|------------|-------------|
|             | C=C   | C-N   | C=N   | C-O  | Pyridinic N | Pyrrolic N | Graphitic N |
| NMC-AT-800  | 41.03 | 50.06 | 8.91  |      | 47.69       | 49.08      | 3.23        |
| NMC-AT-900  | 52.28 | 36.37 | 11.35 |      | 41.85       | 49.56      | 8.59        |
| NMC-AT-1000 | 65.36 | 26.89 | 7.75  |      | 42.43       | 47.60      | 9.97        |
| NMC-AT-1100 | 54.4  | 16.83 | 20.39 | 8.38 | 31.11       | 37.7       | 31.19       |

**Table S2:** Comparison of the ORR activity of different N-doped carbon electrocatalysts with NMC-AT-1000 catalyst

| S.No | Electrocatalyst               | On-Set potential (V) | Current density (mA/cm <sup>2</sup> ) | Electron transfer number | Reference        |
|------|-------------------------------|----------------------|---------------------------------------|--------------------------|------------------|
| 1    | 3D-NG@SiO <sub>2</sub> -2-900 | 0.91                 | 4                                     | 3.9                      | [1]              |
| 2    | NPGC-950                      | 0.91                 | 4.8                                   | 3.8                      | [2]              |
| 3    | NG900                         | 0.89                 | 4.5                                   | 3.2                      | [3]              |
| 4    | N-RGO-800                     | 0.86                 | 5.0                                   | 3.8                      | [4]              |
| 5    | N-G-1000                      | 0.83                 | 5.1                                   | 3.9                      | [5]              |
| 6    | N-hG6                         | 0.83                 | 5.2                                   | 3.9                      | [6]              |
| 7    | NMC-AT-1000                   | 0.87                 | 5.1                                   | 4.02                     | <b>This work</b> |

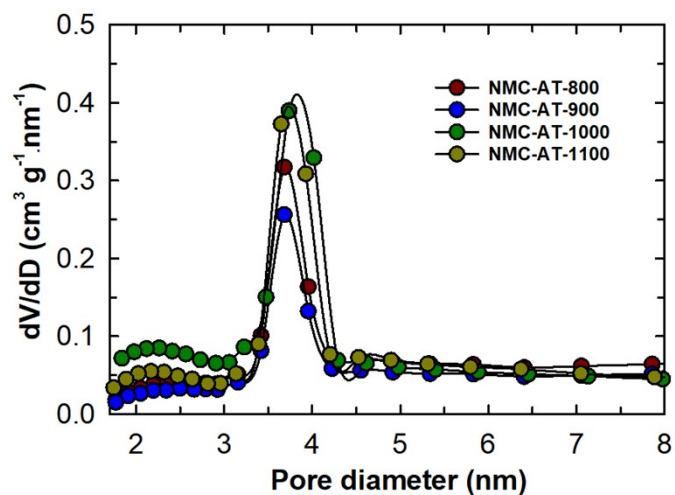

**Fig. S1** Pore size distribution of NMC-AT samples.

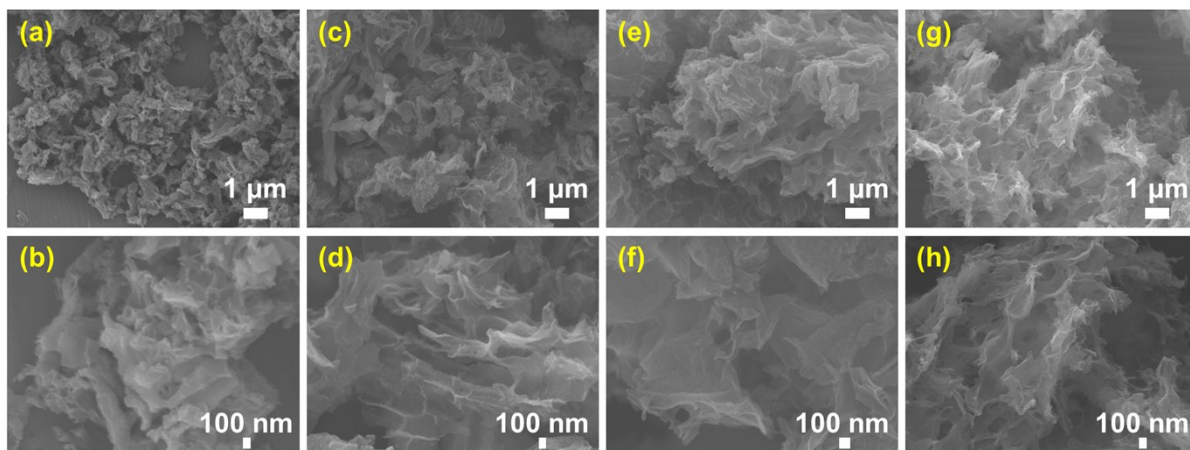

**Fig. S2** Low and high magnification SEM images of (a & b) NMC-AT-800, (c & d) NMC-AT-900, (e & f) NMC-AT-1000, and (g & h) NMC-AT-1100 samples

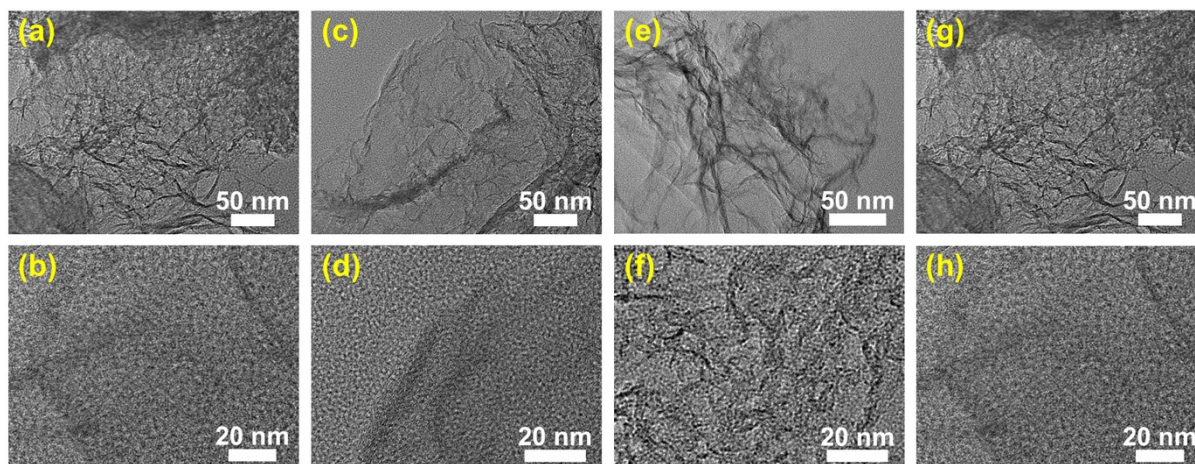

**Fig. S3** Low and high magnification TEM images of (a & b) NMC-AT-800, (c & d) NMC-AT-900, (e & f) NMC-AT-1000, and (g & h) NMC-AT-1100 samples.

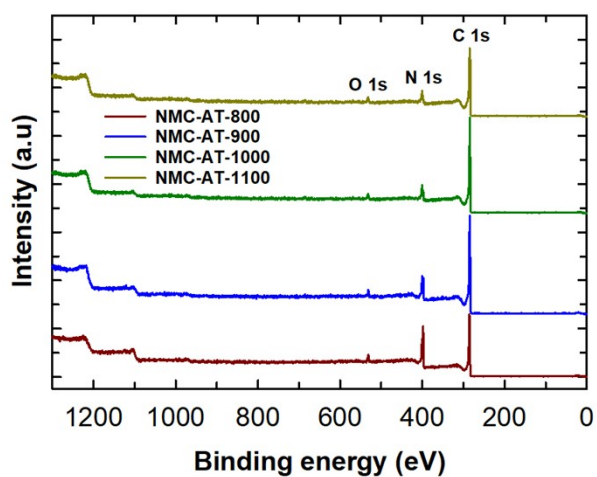

**Fig. S4** Survey spectrum of NMC-AT samples

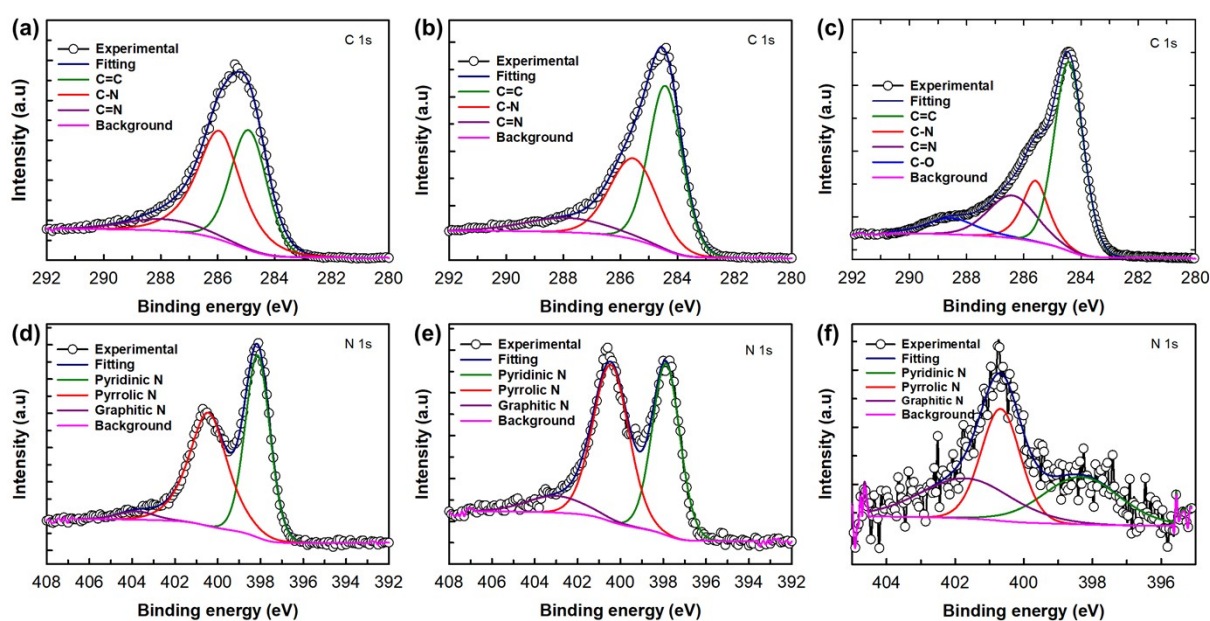

**Fig S5** XPS deconvolutions of C 1s and N 1s spectra (a & d) NMC-AT-800, (b & e) NMC-AT-900, and (c & f) NMC-AT-1100 samples.

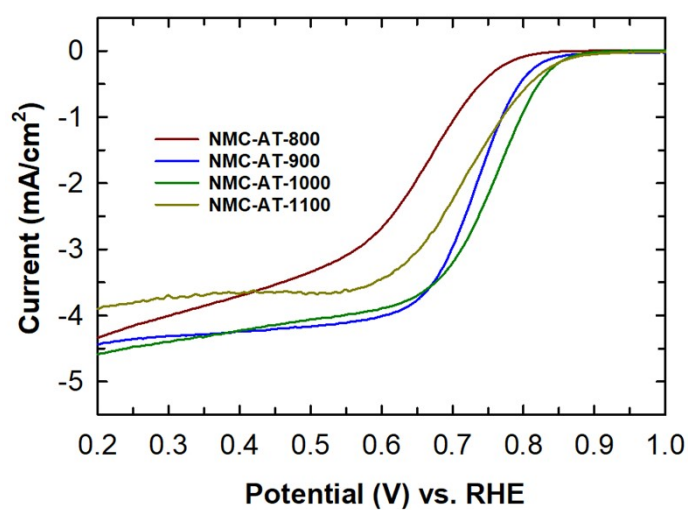

**Fig. S6** LSV curves of the NMC-AT samples at a scan rate of 5 mV/s.

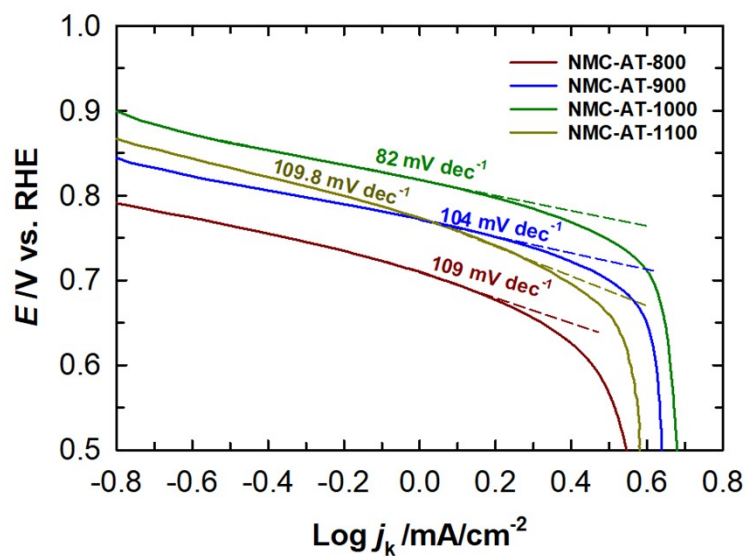

Fig. S7 Tafel slope of NMC-AT samples.

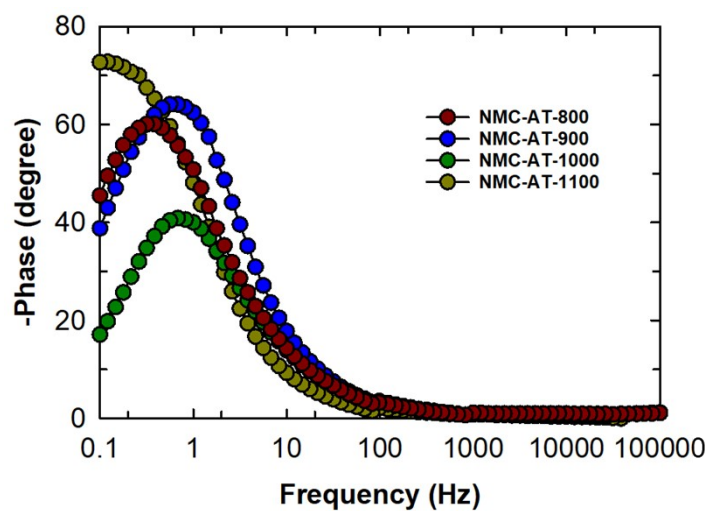

Fig. S8 Bode-plot of NMC-AT samples.

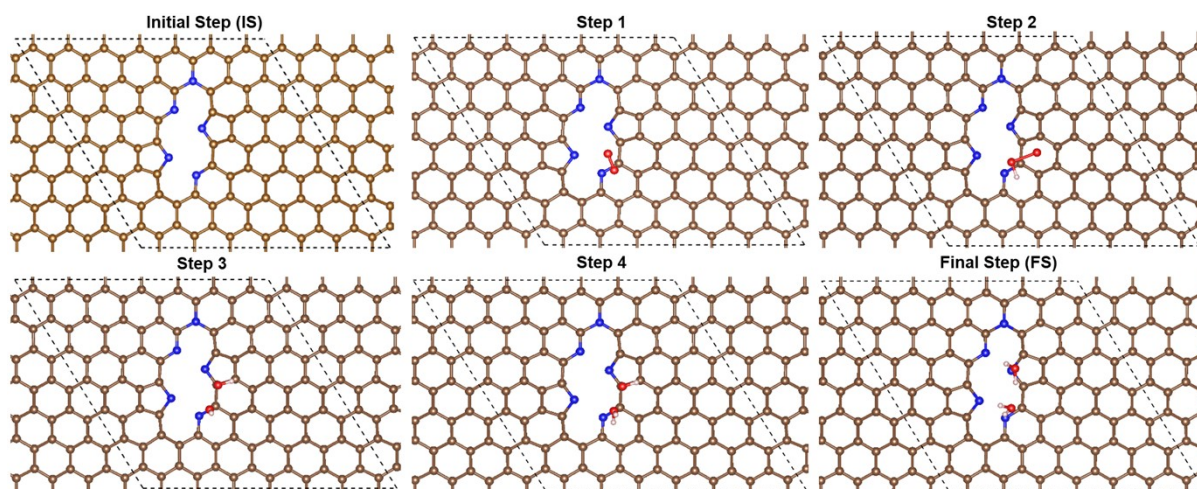

Fig. S9 Electrochemical ORR four-electron pathway of NMC-AT sample.

## References:

- [1] X.W. Lu, Z.F. Li, X.Y. Yin, S.W. Wang, Y.R. Liu, Y.X. Wang, Controllable synthesis of three-dimensional nitrogen-doped graphene as a high performance electrocatalyst for oxygen reduction reaction, *International Journal of Hydrogen Energy* 42(27) (2017) 17504-17513. <https://doi.org/10.1016/j.ijhydene.2017.02.090>.
- [2] B. Men, Y.Z. Sun, M.J. Li, C.Q. Hu, M. Zhang, L.N. Wang, Y. Tang, Y.M. Chen, P.Y. Wan, J.Q. Pan, Hierarchical Metal-Free Nitrogen-Doped Porous Graphene/Carbon Composites as an Efficient Oxygen Reduction Reaction Catalyst, *Acs Appl Mater Inter* 8(2) (2016) 1415-1423. <https://doi.org/10.1021/acsami.5b10642>.
- [3] Y.Y. She, J.F. Chen, C.X. Zhang, Z.G. Lu, M. Ni, P.H.L. Sit, M.K.H. Leung, Nitrogen-doped graphene derived from ionic liquid as metal-free catalyst for oxygen reduction reaction and its mechanisms, *Applied Energy* 225 (2018) 513-521. <https://doi.org/10.1016/j.apenergy.2018.05.015>.
- [4] H. Miao, S.H. Li, Z.H. Wang, S.S. Sun, M. Kuang, Z.P. Liu, J.L. Yuan, Enhancing the pyridinic N content of Nitrogen-doped graphene and improving its catalytic activity for oxygen reduction reaction, *International Journal of Hydrogen Energy* 42(47) (2017) 28298-28308. <https://doi.org/10.1016/j.ijhydene.2017.09.138>.
- [5] X.Y. Lu, D. Wang, L.P. Ge, L.H. Xiao, H.Y. Zhang, L.L. Liu, J.Q. Zhang, M.Z. An, P.X. Yang, Enriched graphitic N in nitrogen-doped graphene as a superior metal-free electrocatalyst for the oxygen reduction reaction, *New Journal of Chemistry* 42(24) (2018) 19665-19670. <https://doi.org/10.1039/c8nj04857f>.
- [6] Y. Bian, H. Wang, J. Hu, B. Liu, D. Liu, L. Dai, Nitrogen-rich holey graphene for efficient oxygen reduction reaction, *Carbon* 162 (2020) 66-73. <https://doi.org/10.1016/j.carbon.2020.01.110>.
